# Supplementary material
Source: MDPI journal article supplement (https://www.mdpi.com/1999-4907/6/12/4377)
Supplement: s1 [file s1]

Supplementary Materials

**Table S1.** The climate, ecosystems and predominant tree species of Kamloops timber supply area.

| **Forested Zones 1** | **Area (ha)** | **Predominant Tree Species** | **Climate 2** |
| --- | --- | --- | --- |
| Engelmann Spruce–Subalpine Fir | 871,700 | *Picea engelmannii, Abies lasiocarpa, Pinus contorta* | Short, cool and moist summer, long, cold, and snowy winter  MAT = 1.3, MAP = 816, MAX = 18.2,  MIN = −15.4 FFP = 76, CMD = 78 |
| Interior  Cedar–Hemlock | 666,800 | *Picea engelmannii × glauca, Pseudotsuga menziesii,  Pinus contorta, Populus tremuloides,  Abies lasiocarpa, Thuja plicata,  Tsuga heterophylla* | Warm summer and cool snowy winter  MAT = 3.7, MAP = 793, MAX = 22,  MIN = −11.5, FFP = 102, CMD = 167 |
| Interior Douglas-fir | 636,100 | *Picea engelmannii × glauca, Pseudotsuga menziesii,  Pinus contorta, Populus tremuloides* | Hot, dry summer, cool, dry winter  MAT = 4.8, MAP = 488, MAX = 23.4,  MIN = −10.9, FFP = 112, CMD = 333 |
| Montane Spruce | 245,800 | *Picea engelmannii × glauca, Pseudotsuga menziesii,  Pinus contorta* | Cool, dry summer, cold, wet winter  MAT = 3.1, MAP = 521, MAX = 20.6,  MIN = −11.3, FFP = 97, CMD = 230 |
| Sub-boreal Pine Spruce | 12,400 | *Picea engelmannii × glauca, Pseudotsuga menziesii,  Pinus contorta* | Cool, dry summer, cold, wet winter  MAT = 3.1, MAP = 536, MAX = 21.4,  MIN = −12.6, FFP = 89, CMD = 239 |
| Sub-boreal Spruce | 66,100 | *Picea engelmannii × glauca,  Pinus contorta* | Cool, moist summer, cold, wet winter  MAT = 2.6, MAP = 644, MAX = 20.3,  MIN = −12.5, FFP = 86, CMD = 158 |
| Ponderosa Pine | 76,000 | *Pinus ponderosa* | Hot, dry summer, cool, dry winter  MAT = 6.2, MAP = 322, MAX=25.4,  MIN = −9.8, FFP = 133, CMD = 478 |

1 [1]; 2 Climate summary for 1971–2000 normals: MAT = mean annual temperature (°C), MAP = mean annual precipitation (mm), MAX = mean maximum temperature of warmest month (°C), MIN = mean minimum temperature of coldest month (°C), FFP is frost free period (days), CMD = climatic moisture deficit (sum of the monthly evaporative demand minus precipitation, mm). (Source: Climate WNA spatial climate software: http://climatewna.com/; [2]).

**Table S2.** British Columbia government reports and datasets that provided information to the study.

| **Title** | **Available from** | **Accessed** |
| --- | --- | --- |
| Consideration of Climate Change When Addressing Long-Term Forest Health in Stocking Standards. | http://www.for.gov.bc.ca/het/climate/knowledge/memo-consideration-of-climate-change_april2013.pdf | May 2013 |
| Guidance for assessing FSP stocking standards alignment with addressing immediate and long-term forest health issues. | www.for.gov.bc.ca/hfp/silviculture/ | May 2011 |
| Harvest Billing System Dataset 1979–2010 | www.for.gov.bc.ca/hva/hbs/ | August 2011 |
| Interior Appraisal Manual 1 July 2012 | www.for.gov.bc.ca/hva/manuals/ interior.htm. | November 2012 |
| Interior Log Market Report (monthly series). | http://www.for.gov.bc.ca/hva/ logreports.htm | November 2012 |
| Kamloops Timber Supply Analysis Information Package | ftp://ftp.for.gov.bc.ca/hfp/external/!publish/fft_standards_on_cms_web/SilvicultureStrategyDocuments/Kamloops_TSA_11/KamloopsT2Delivery/documents/reports/infopak.pdf | August 2011 |
| Kamloops Timber Supply Area: Rationale for Allowable Annual Cut (AAC) Determination. | http://www.for.gov.bc.ca/hts/tsa/tsa11/current_tsr/11ts08ra.pdf | August 2011 |
| Reporting Silviculture Updates and Land status Tracking System 1980–2010 | www.for.gov.bc.ca/his/results/index.htm | October 2011 |
| Tree Species Composition and Diversity in British Columbia. Forest and Range Evaluation Program report #14. | http://www.for.gov.bc.ca/hfp/frep/publications/reports.htm#rep14 | October 2011 |
| Pest Infestation Polygons | www.data.gov.bc.ca | October 2011 |
| Provincial-Level Projection of the Current Mountain Pine Beetle Outbreak (polygon data) | www.for.gov.bc.ca/ftp/HRE/external/%21publish/web/BCMPB/Year8/ | October 2011 |
| Vegetation Resource Inventory (polygon data) | www.data.gov.bc.ca | October 2011 |


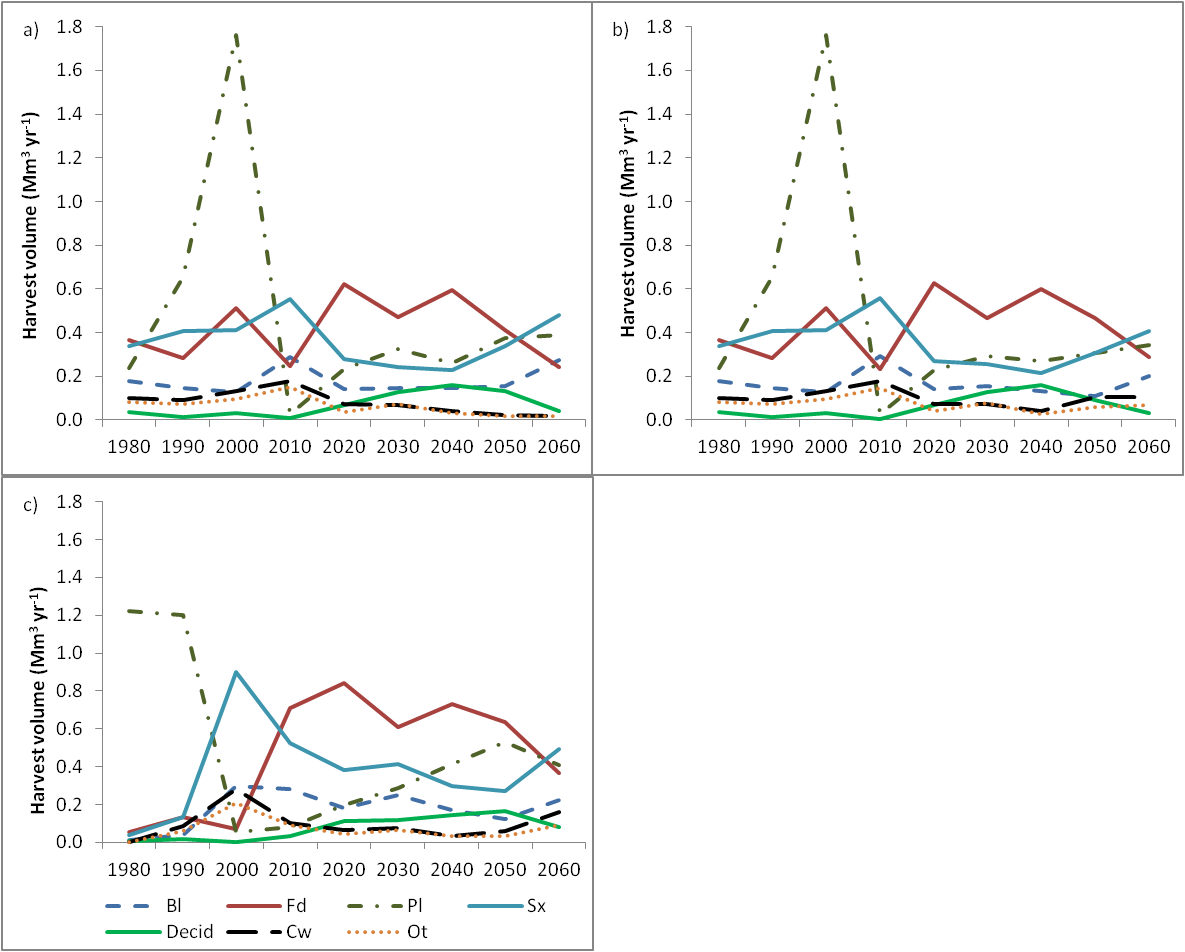


**Figure S1.** Annual species harvest rates for Kamloops Timber Supply Area: (**a**) business as usual; (**b**) mixed plant; and (**c**) early pine cut, mixed planting, and increased natural regeneration strategies.
Bl = subalpine fir, Cw = western redcedar, Decid = trembling aspen and paper birch, Fd = Douglas-fir,
Pl = lodgepole pine, Sx = Engelmann X white spruce, and Ot = other species (western hemlock, ponderosa pine, and western larch


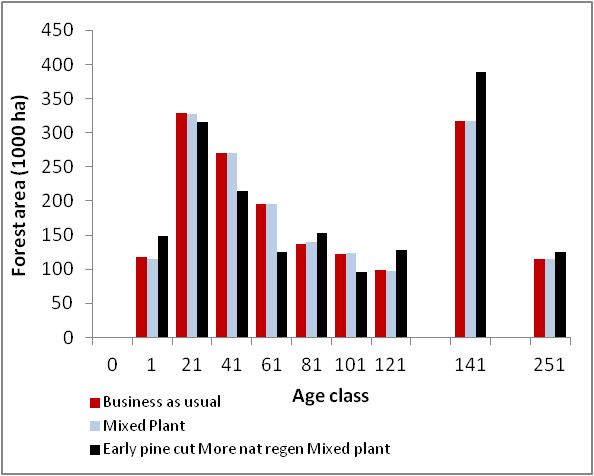


**Figure S2.** Age class distribution in 2060 for all forested land in Kamloops TSAs for each management strategy. Note the age classes are not consistent.


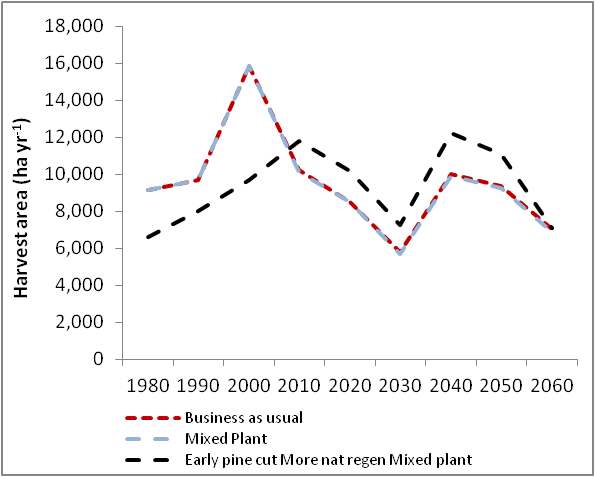


**Figure S3.** Area harvested annually for each management strategy.

**References**

1. Lloyd, D.A.; Angove, K.; Hope, G.D.; Thompson, C. A guide to site identification and interpretation for the Kamloops forest region. In *Land Management Handbook,* 23nd; Government of British Columbia: Victoria, BC, Canada, 1990.
2. Wang, T; Hamman, A.; Spittlehouse, D.L.; Murdock, T.Q. ClimateWNA—High-resolution spatial climate data for western North America. J. App. Meteor. Climatol. **2012**, *51*, 16–29
